# Supplementary material for: Capturing functional strategies and compositional dynamics invegetation demographic models
Source: Copernicus journal article supplement (doi:10.5194/bg-2021-54), 2021-03-23
Supplement: Supplementary file 1 [file SI_table1.xlsx]

## Sheet: Parameters
Parameter Name	Description	Dimension	Units	Conifer min	Conifer max	Pine Min	Pine Max	Cedar Min	Cedar Max
BG Mort	background mortality rate	PFT	1/yr	0.005	0.05	NA	NA	NA	NA
Freese Tol	minimum temperature tolerance	PFT	degC	-32	-12	NA	NA	NA	NA
Hydr Mort	soil moisture (btran units) at which drought mortality begins for non-hydraulic model	PFT	btran, unitless	5e-07	1e-05	NA	NA	NA	NA
C Starve	maximum mortality rate from cold stress	PFT	1/yr	0.1	5	NA	NA	NA	NA
Cold Mort	maximum mortality rate from carbon starvation	PFT	1/yr	0.1	1	NA	NA	NA	NA
Hydr Failure	plant fractional loss of conductivity at which drought mortality begins for hydraulic model	PFT	fraction	0.1	1	NA	NA	NA	NA
Seed Supply	Supplemental external seed rain source term (non-mass conserving)	PFT	kgC/m2/yr	0	0.3	NA	NA	NA	NA
Seed Germ	fraction of seeds that germinate per year	PFT	fraction	0.25	1	NA	NA	NA	NA
Seed Decay	fraction of seeds that decay per year	PFT	fraction	0.05	1	NA	NA	NA	NA
Seed Repro	the diameter (if any) where the plant will start extra clonal allocation to the seed pool	PFT	cm	20	90	NA	NA	NA	NA
Seed Alloc Mature	the diameter (if any) where the plant will start extra clonal allocation to the seed pool	PFT	fraction	0	0.5	NA	NA	NA	NA
Seed Alloc	fraction of available carbon balance allocated to seeds	PFT	fraction	0.085	0.115	NA	NA	NA	NA
Min Recruit Ht	the minimum height (ie starting height) of a newly recruited plant	PFT	m	0.5	1.5	NA	NA	NA	NA
Recruit Density	initial seedling density for a cold-start near-bare-ground simulatio	PFT	stems/m2	0.08	0.2	NA	NA	NA	NA
Storage Cushion	maximum size of storage C pool, relative to maximum size of leaf C pool	PFT	fraction	0.5	1.5	NA	NA	NA	NA
Leaf Storage	factor governing priority of replacing storage with NPP	PFT	unitless	0.5	1	NA	NA	NA	NA
Root Life	root longevity	PFT	yr	1	5	NA	NA	NA	NA
Root a	rooting parameter	PFT	1/m	0.1	7	NA	NA	NA	NA
Root b	rooting parameter	PFT	1/m	0.1	3	NA	NA	NA	NA
Branch Turn	branch turnover	PFT	yr	30	80	NA	NA	NA	NA
LF2FR Allom	Allocation parameter: fine root C per leaf C	PFT	gC/gC	0.85	1.15	NA	NA	NA	NA
SALmax	Maximum Specific Leaf Area (SLA), even if under a dense canopy	PFT	m2/gC	0.002	0.074	0.0072	0.0109	0.0046	0.01
SLAtop	Specific Leaf Area (SLA) at top of canopy, projected area basis	PFT	m2/gC	0.002	0.037	0.0069	0.0106	0.0043	0.0097
VC max	maximum carboxylation rate of Rub. at 25C, canopy top	PFT	umol CO2/m^2/s	27	76.7	42.7	76.7	42.7	76.7
Leaf Life	leaf longevity	PFT	yr	1	26	NA	NA	NA	NA
BB Slope	stomatal slope parameter, as per Ball-Berry	PFT	unitless	6	9	NA	NA	NA	NA
Leaf N	leaf nitrogen stoichiometry	PFT	gN/gC	0.008	0.047	0.016	0.029	0.008	0.027
Root N	root nitrogen stoichiometry	PFT	gN/gC	0.008	0.047	NA	NA	NA	NA
SMPSC	Soil water potential at full stomatal closure	PFT	mm	-790280	-254929	-393610	-268185	-790280	-393610
Bark	bark thickness	PFT	fraction of dbh	0.017	0.117	0.035	0.082	0.05	0.117
Crowh Depth	the depth of a cohorts crown as a fraction of its height	PFT	fraction of height	0.01	0.5	NA	NA	NA	NA
Crown Kill	fire parameter, see equation 22 in Thonicke et al 2010	PFT	fraction	0.5	1	NA	NA	NA	NA
Scorch height	fire parameter	PFT	NA	0.1	0.3	NA	NA	NA	NA
Comp Excln	IF POSITIVE: weighting factor (exponent on dbh) for canopy layer exclusion and promotion, IF NEGATIVE: switch to use deterministic height sorting	scalar	unitless	1	4	NA	NA	NA	NA
Disturb Frac	fraction of canopy mortality that results in disturbance (i.e. transfer of area from new to old patch)	scalar	fraction of canopy mortality	0	1	NA	NA	NA	NA
D2H1 Allom	Parameter 1 for d2h allometry (intercept, or c)	PFT		0.64	1.45	NA	NA	NA	NA
D2H2 Allom	Parameter 2 for d2h allometry (slope, or m)	PFT		0.315845	-1.01149	NA	NA	NA	NA
dbh Max Ht	he diameter (if any) corresponding to maximum height, diameters may increase beyond this	PFT		45	60	NA	NA	NA	NA
AGB2 Allom	Parameter 2 for agb allometry	PFT		0.3	2.9	NA	NA	NA	NA
AGB3 Allom	Parameter 3 for agb allometry	PFT		1.5775	1.0471	NA	NA	NA	NA
Wood Density	wood density	PFT		0.35	0.72	0.364	0.5	0.35	0.541
D2BL1 Allom	Parameter 1 for d2bl allometry	PFT		0.008	0.02	NA	NA	NA	NA
D2BL2 Allom	Parameter 2 for d2bl allometry	PFT		2.26001	2.24653	NA	NA	NA	NA
LA per SLA	Leaf area per sapwood area, intercept	PFT		0.15	0.35	NA	NA	NA	NA
D2Can Max	max (savanna) dbh to area multiplier factor where: area = n*d2ca_coeff*dbh^beta	PFT		0.5	0.8	NA	NA	NA	NA
D2Can Min	min (forest) dbh to area multiplier factor where: area = n*d2ca_coeff*dbh^beta	PFT		0.05	0.35	NA	NA	NA	NA

## Sheet: Allometry
This is old. We decided to calculate second and third parameters based on the first parameter. Correct data ranges in Parameters sheet.
Keeping to have a handy reference for "good" sets
allometry needs to be run with sets of parameters that vary together, not random draws from a range for each
These parameter values determined from ploting observations and adjusting the parameter values to match. See file link:
https://docs.google.com/spreadsheets/d/1v2zaKrd1-zFGSj9aBpWdTZMwUGp_wVACGXbvUTkDFyE/edit?usp=sharing
create min and max and add correlation coefficient for multiple params
	d2h1	d2h2	dbh_max_height	agb1	abg2	abg3	abg4	density	d2bl p1	d2bl p2	d2bl p3	la_per_sla_int	la_per_sla_slp
pine 1	1.45	-1	60	1	2.7	1.05	1	0.4	0.01	2.3	1	0.2	0
pine 2	1.45	-1	60	1	2.9	1.08	1	0.4	0.01	2.3	1	0.2	0
pine 3	0.64	0.37	60	1	2.7	1.05	1	0.4	0.01	2.3	1	0.2	0
pine 4	0.64	0.37	60	1	2.9	1.08	1	0.4	0.01	2.3	1	0.2	0
cedar 1	1.45	-1	60	1	2.7	0.99	1	0.35	0.01	2.3	1	0.2	0
cedar 2	1.45	-1	60	1	2.7	0.99	1	0.35	0.02	2.2	1	0.2	0
oak 1	0.85	-0.05	60	1	0.3	1.58	1	0.72	0.3	1.9	1	0.2	0
fir 1	0.78	0.37	45	1	2.7	0.99	1	0.35	0.01	2.3	1	0.2	0
pine 5	1.45	-1	60	1	2.7	1.05	1	0.4	0.01	2.3	1	0.3	0
pine 6	1.45	-1	60	1	2.9	1.08	1	0.4	0.01	2.3	1	0.3	0
pine 7	0.64	0.37	60	1	2.7	1.05	1	0.4	0.01	2.3	1	0.3	0
pine 8	0.64	0.37	60	1	2.9	1.08	1	0.4	0.01	2.3	1	0.3	0
cedar 3	1.45	-1	60	1	2.7	0.99	1	0.35	0.01	2.3	1	0.3	0
cedar 4	1.45	-1	60	1	2.7	0.99	1	0.35	0.02	2.2	1	0.3	0
oak 2	0.85	-0.05	60	1	0.3	1.58	1	0.72	0.3	1.9	1	0.3	0
fir 2	0.78	0.37	45	1	2.7	0.99	1	0.35	0.01	2.3	1	0.3	0
