# Supplementary material for: Capturing functional strategies and compositional dynamics invegetation demographic models
Source: Copernicus journal article supplement (doi:10.5194/bg-2021-54), 2021-03-23
Supplement: Supplementary file 2 [file bg-2021-54-supplement.zip]

Archive with 2 entries (2 files):
- SI_figures.pdf
- SI_table1.xlsx
